# Supplementary material
Source: PubMed Central journal article supplement (PMC7610386)
Supplement: EMS118040-supplement-Supplementary_Note.pdf [file EMS118040-supplement-Supplementary_Note.pdf]

## Supplementary Note

For conditional analysis and fine-mapping we used an LD reference panel consisting of 10,000 randomly selected individuals of European ancestry from UK Biobank. To check that this LD panel is suitable, we performed conditional analysis with GCTA on both the IGAP study (Kunkle et al. 2019) and on our meta-analysis (Kunkle et al. + UK Biobank GWAX). Because the Kunkle et al. study has lower power, we do not expect to detect as many independent signals as in the meta-analysis. The table below shows the independent signals detected with GCTA at a threshold of  $p < 10^{-5}$  in each dataset. Lines absent in the Kunkle-only dataset had no SNP with  $p < 10^{-5}$  in their discovery stage summary statistics.

| Chr | Kunkle + UKB meta |          |                                         |        | Kunkle |          |                                          |
|-----|-------------------|----------|-----------------------------------------|--------|--------|----------|------------------------------------------|
|     | Lead SNP pos      | Lead p   | Indep SNPs                              | N snps | N snps | lead_p   | SNPs                                     |
| 1   | 161,155,392       | 4.30E-08 | rs4575098                               | 1      |        |          |                                          |
| 1   | 207,750,568       | 1.40E-23 | rs679515                                | 1      | 1      | 1.72E-16 | rs679515                                 |
| 2   | 65,608,363        | 1.54E-08 | rs268134                                | 1      |        |          |                                          |
| 2   | 106,366,056       | 1.28E-12 | rs143080277<br>rs116038905              | 2      |        |          |                                          |
| 2   | 127,892,810       | 1.10E-54 | rs7584040<br>rs6733839                  | 2      | 2      | 4.11E-28 | rs34745987<br>rs6733839                  |
| 2   | 135,372,951       | 5.24E-08 | rs35564151                              | 1      |        |          |                                          |
| 2   | 233,981,912       | 1.41E-10 | rs10933431                              | 1      | 1      | 2.47E-07 | rs10933431                               |
| 4   | 11,027,619        | 2.59E-11 | rs4351014                               | 1      |        |          |                                          |
| 6   | 32,560,025        | 2.88E-15 | rs36096565                              | 1      | 2      | 3.98E-07 | rs3132963<br>rs112742095                 |
| 6   | 40,942,196        | 1.83E-23 | rs187370608<br>rs114812713<br>rs3857580 | 3      | 3      | 2.91E-12 | rs192675224<br>rs114812713<br>rs75932628 |
| 6   | 47,595,155        | 1.11E-11 | rs1385742                               | 1      | 1      | 2.41E-08 | rs1385742                                |
| 7   | 50,270,105        | 7.68E-08 | rs2168589                               | 1      | 1      | 3.34E-06 | rs11423121                               |
| 7   | 99,971,834        | 3.28E-18 | rs1859788                               | 1      |        |          |                                          |
| 7   | 143,107,588       | 9.63E-12 | rs12703526<br>rs10265814                | 2      | 1      | 1.62E-08 | rs11767557                               |
| 8   | 27,468,503        | 7.71E-26 | rs73223431<br>rs867230                  | 2      | 2      | 3.26E-17 | rs73223431<br>rs867230                   |
| 10  | 11,720,308        | 1.08E-11 | rs7920721                               | 1      | 1      | 3.40E-08 | rs12416487                               |
| 10  | 61,645,833        | 3.80E-08 | rs1171814                               | 1      | 1      | 8.67E-06 | rs142366127                              |
| 10  | 82,280,137        | 2.74E-09 | rs1878036                               | 1      | 1      | 6.97E-06 | rs1870148                                |
| 11  | 47,391,948        | 6.91E-11 | rs10437655                              | 1      | 1      | 8.41E-11 | rs3740688                                |
| 11  | 60,095,740        | 9.33E-20 | rs72924626                              | 1      | 1      | 1.36E-16 | rs1582763                                |
| 11  | 85,867,875        | 5.21E-26 | rs10792832                              | 1      | 1      | 5.75E-16 | rs3851179                                |
| 11  | 121,435,587       | 5.59E-14 | rs11218343                              | 1      | 1      | 2.64E-08 | rs11218343                               |
| 14  | 53,391,680        | 3.69E-10 | rs17125924                              | 1      | 1      | 6.78E-07 | rs17125924                               |
| 14  | 92,938,855        | 7.45E-14 | rs12590654                              | 1      | 1      | 7.89E-09 | rs12590654                               |

|    |            |          |                         |   |   |          |             |
|----|------------|----------|-------------------------|---|---|----------|-------------|
| 15 | 50,992,311 | 1.74E-09 | rs12592778              | 1 |   |          |             |
| 15 | 59,022,615 | 2.67E-11 | rs4775044<br>rs442495   | 2 | 1 | 3.79E-06 | rs383902    |
| 15 | 63,569,902 | 1.05E-08 | rs117618017             | 1 |   |          |             |
| 16 | 31,126,321 | 4.47E-09 | rs2884738               | 1 |   |          |             |
| 16 | 81,773,209 | 5.46E-08 | rs12444183              | 1 | 1 | 2.06E-06 | rs34971488  |
| 17 | 5,133,128  | 1.35E-09 | rs61182333              | 1 |   |          |             |
| 17 | 56,404,349 | 3.07E-07 | rs2526378               | 1 | 1 | 3.61E-07 | rs2632516   |
| 17 | 61,560,763 | 1.21E-08 | rs3730025<br>rs4311     | 2 | 1 | 7.51E-06 | rs138190086 |
| 19 | 1,050,874  | 2.41E-13 | rs12151021<br>rs4147918 | 2 | 1 | 2.34E-10 | rs12151021  |
| 19 | 51,727,962 | 1.29E-08 | rs3865444               | 1 | 1 | 3.61E-07 | rs3865444   |
| 20 | 54,998,544 | 1.07E-10 | rs6014724               | 1 | 1 | 3.53E-07 | rs6014724   |
| 21 | 28,148,191 | 3.09E-08 | rs4817090<br>rs2830489  | 2 | 1 | 2.38E-07 | rs2830489   |

For most loci, the same number of independent signals is detected, but in a few cases there are more signals discovered in the meta-analysis, as might be expected based on increased study power. Notably, although UK Biobank is not a perfect match with the Kunkle et al. study, we did not see evidence of spurious independent signals.

To investigate fine-mapping, we applied FINEMAP to summary statistics from Kunkle et al. as well as to our meta-analysis. For each locus we specified the maximum number of causal variants as the number determined by GCTA for the meta-analysis, under the assumption that there are likely to be at least this many causal variants. We compared overlap between the 95% credible sets determined by FINEMAP. In general, fine-mapped credible sets based on the meta-analysis were considerably smaller, as expected. In most cases >90% of the SNP probability was in variants that overlapped with the credible set determined from fine-mapping Kunkle et al.

| Locus   | Meta-analysis |                             |                              | credset size | Kunkle only               |                            |
|---------|---------------|-----------------------------|------------------------------|--------------|---------------------------|----------------------------|
|         | credset size  | credset overlap with Kunkle | snp prob overlap with Kunkle |              | credset overlap with Meta | snp prob overlap with Meta |
| ADAMTS4 | 37            | 37                          | 0.954                        | 2645         | 37                        | 0.051                      |
| CR1     | 10            | 10                          | 0.965                        | 17           | 10                        | 0.749                      |
| SPRED2  | 4             | 4                           | 0.962                        | 2365         | 4                         | 0.189                      |
| NCK2    | 1             | 1                           | 1.000                        | 3131         | 1                         | 0.331                      |
| BIN1    | 150           | 11                          | 1.270                        | 11           | 11                        | 1.964                      |
| TMEM163 | 104           | 104                         | 0.952                        | 920          | 104                       | 0.053                      |
| INPP5D  | 6             | 6                           | 0.957                        | 19           | 6                         | 0.804                      |
| CLNK    | 16            | 16                          | 0.966                        | 600          | 16                        | 0.477                      |
| HLA     | 102           | 0                           | 0.000                        | 371          | 0                         | 0.000                      |
| TREM2   | 10            | 4                           | 2.537                        | 7            | 4                         | 1.068                      |
| CD2AP   | 66            | 66                          | 0.951                        | 82           | 66                        | 0.809                      |

|             |     |     |       |      |     |       |
|-------------|-----|-----|-------|------|-----|-------|
| IKZF1       | 14  | 0   | 0.000 | 19   | 0   | 0.000 |
| PILRA       | 6   | 6   | 0.968 | 241  | 6   | 0.364 |
| EPHA1       | 33  | 0   | 0.000 | 7    | 0   | 0.000 |
| PTK2B-CLU   | 15  | 14  | 1.922 | 48   | 14  | 1.526 |
| ECHDC3      | 6   | 1   | 0.457 | 6    | 1   | 0.057 |
| CCDC6       | 33  | 33  | 0.952 | 2626 | 33  | 0.232 |
| TSPAN14     | 16  | 16  | 0.958 | 384  | 16  | 0.636 |
| SPI1        | 26  | 8   | 0.538 | 13   | 8   | 0.912 |
| MS4A4A      | 65  | 50  | 0.560 | 79   | 50  | 0.698 |
| PICALM      | 3   | 3   | 0.964 | 11   | 3   | 0.640 |
| SORL1       | 1   | 1   | 1.000 | 1    | 1   | 0.965 |
| FERMT2      | 74  | 70  | 0.935 | 105  | 70  | 0.886 |
| SLC24A4     | 1   | 1   | 0.968 | 35   | 1   | 0.519 |
| SPPL2A      | 46  | 46  | 0.951 | 352  | 46  | 0.473 |
| ADAM10      | 56  | 26  | 1.417 | 127  | 26  | 0.668 |
| APH1B       | 3   | 3   | 0.992 | 2251 | 3   | 0.052 |
| VKORC1      | 48  | 48  | 0.951 | 1133 | 48  | 0.066 |
| PLCG2       | 6   | 6   | 0.962 | 1246 | 6   | 0.015 |
| SCIMP       | 105 | 104 | 0.949 | 493  | 104 | 0.595 |
| TSPOAP1     | 3   | 3   | 0.976 | 9    | 3   | 0.913 |
| ACE         | 95  | 95  | 1.904 | 251  | 95  | 0.855 |
| ABCA7       | 11  | 0   | 0.000 | 2    | 0   | 0.000 |
| CD33        | 8   | 7   | 0.948 | 7    | 7   | 0.951 |
| CASS4       | 11  | 11  | 0.952 | 17   | 11  | 0.850 |
| APP-ADAMTS1 | 34  | 4   | 0.953 | 8    | 4   | 0.908 |

The column “snp prob overlap with Kunkle” shows the total probability of SNPs in the 95% credible set for the meta-analysis which are also in the 95% credible set for Kunkle et al. The column “snp prob overlap with Meta” shows the inverse (Kunkle credible set SNPs that are also in the meta-analysis credible set). Note that in this table, the SNP probability overlap can be larger than 1 for loci with multiple causal variants, since secondary signals are included.

In Supplementary Figure 2, we plotted SNP probabilities determined for the two datasets against each other for each locus.

Based on the above tables, and Supplementary Figure 2, we observe the following:

- At the *BIN1* locus (chr2:127,892,810), two signals are detected in both datasets, with the same lead SNP but different secondary SNPs, which are in LD with each other ( $r^2 = 0.60 - 0.75$  in 1000 genomes EUR populations for rs7584040 and rs34745987).
- At the *PTK2B-CLU* locus (chr:27,468,503), two signals are detected in both datasets, with the same lead SNPs.
- At the *APH1B* locus (chr15:63,569,902), fine-mapping in our meta-analysis strongly prioritises missense SNP rs117618017, whereas Kunkle et al. has low power and prioritises rs12913805. Notably, the FinnGen and Gr@ace studies further support rs117618017 and not rs12913805.

- At the *ABCA7* locus (chr19:1,050,874), fine-mapped SNPs do not overlap. Candidate causal missense SNP rs4147918 (~4% frequency) is prioritised in the meta-analysis, but not in Kunkle et al.
- At the *ECHDC3* locus (chr10:11,720,308), fine-mapped SNPs show some degree of correlation, but a handful of SNPs have strong association in Kunkle et al. and only weak association in UK Biobank.
- At the *HLA* locus (chr6:32,560,025), a single signal is detected in the meta-analysis, but two in the Kunkle-only dataset, with different lead SNPs and inconsistent fine-mapping results. We note that the HLA locus is challenging to fine-map due to its extreme population variability, and in general requires custom imputation and analysis methods to handle.
- At the *EPHA1* locus (chr7:143,107,588), the association pattern (SNP p-values) differs significantly between Kunkle et al. and UK Biobank, and this is reflected in divergent SNP fine-mapping probabilities.

A number of loci are poorly powered in the Kunkle et al. stage 1 summary statistics (e.g. absent or not genome-wide significant in the GCTA table above). Although in most cases fine-mapping results are consistent between the two datasets for these loci, we think that the comparison is less meaningful, and the fine-mapping results from our meta-analysis are likely to be more accurate.
